# Supplementary material
Source: publisher site journal article supplement (https://www.dovepress.com/get_supplementary_file.php?f=317735.xlsx)
Supplement: Supplementary file 1 [file get_supplementary_file.php]

## Sheet: Sheet1
	Supplementary Table S1:List of all the variables
No.	Variables
1	Absolute value of immature granulocytes
2	Acute heart failure
3	Age
4	Alanine aminotransferase
5	Albumin
6	Asthma
7	Basophils
8	Blood bicarbonate
9	Blood calcium
10	Blood chlorine
11	Blood glucose
12	Blood phosphorus
13	Blood urea nitrogen
14	Blood urea nitrogen/albumin
15	Blood urea nitrogen＞7
16	Breathing rate＞30 times/min
17	Ceramic oxalacetic transaminase
18	Chronic obstructive pulmonary disease
19	Conscious state
20	C-reactive protein
21	CURB-65
22	Diabetes mellitus
23	Diastolic blood pressure
24	Eosinophils
25	Erythrocyte sedimentation rate
26	Fluoroquinolone alone
27	Gender
28	Globulin
29	Hematocrit
30	Hematocrit＜0.3
31	Hemoglobin
32	Lymphocyte cells
33	Lymphocytes/monocytes ratio
34	Mean corpuscular volume
35	Mean corpusular hemoglobin
36	Mean corpusular hemoglobin concerntration
37	Mean platelet volume
38	Monocytes
39	Mycoplasma pneumoniae infection
40	Nebulizer therapy
41	Neutrophils
42	Neutrophils/lymphocytes ratio
43	Other antibiotics
44	Pathogen positive
45	Platelet distribution width
46	Platelet-large cell ratio
47	Plateletocrit
48	Pulse rate
49	Red blood cell
50	Red blood cell volume distribution width
51	Serum creatinine
52	Serum potassium
53	Serum sodium
54	Smoke
55	Standard deviation of red blood cell distribution width
56	Systolic blood pressure
57	Total protein
58	Uric acid
59	White blood cells
60	β-lactam monotherapy
61	β-lactam plus fluoroquinolone
62	β-lactam plus macrolide
